# Supplementary material for: A role for FOXO1 in BCR–ABL1-independent tyrosine kinase inhibitor resistance in chronic myeloid leukemia
Source: PubMed Central journal article supplement — Leukemia. 2016 Apr 5;30(7):1493–501. doi: 10.1038/leu.2016.51 (PMC4935980; doi:10.1038/leu.2016.51), 2016-04-05
Supplement: leu201651x1.pdf [file leu201651x1.pdf]

## SUPPLEMENTARY INFORMATION

### **A role for FOXO1 in BCR-ABL1-independent tyrosine kinase inhibitor resistance in chronic myeloid leukemia**

Marie-Claire Wagle<sup>1</sup>, Anna M. Eiring<sup>2</sup>, Matthew Wongchenko<sup>1</sup>, Shan Lu<sup>1</sup>, Ying Guan<sup>1</sup>, Yulei Wang<sup>1</sup>, Mark Lackner<sup>1</sup>, Lukas Amler<sup>1</sup>, Garret Hampton<sup>1</sup>, Michael W. Deininger<sup>2,3</sup>, Thomas O'Hare<sup>2,3\*</sup>, and Yibing Yan<sup>1\*</sup>

<sup>1</sup>Oncology Biomarker Development, Genentech, 1 DNA Way, South San Francisco, CA 94080, USA; <sup>2</sup>Huntsman Cancer Institute, The University of Utah, Salt Lake City, UT 84112, USA; <sup>3</sup>Division of Hematology and Hematologic Malignancies, The University of Utah, Salt Lake City, UT 84112, USA.

\*CORRESPONDENCE: Thomas O'Hare, PhD; 2000 Circle of Hope, Room 4264, Salt Lake City, UT 84112; Ph: 801-585-0256; E-Mail: [thomas.ohare@hci.utah.edu](mailto:thomas.ohare@hci.utah.edu). Yibing Yan, Ph.D.; Genentech Inc., 1 DNA Way, South San Francisco, CA 94080; Ph: 650-225-5049; E-mail: [yan.yibing@gene.com](mailto:yan.yibing@gene.com).

Running Title: Elevated FOXO1 in BCR-ABL1-independent resistance

Key Words: Chronic myeloid leukemia, FOXO1, tyrosine kinase inhibitors

Conflict of Interest: Some of the authors are employees of Roche/Genentech. We used our in-house molecules, GDC-0941 and GDC-0973, as representative PI3K and MEK kinase inhibitors, respectively. These molecules have been published and are available from commercial sources. Furthermore, our findings should be applicable to similar inhibitors from other sources.

## Supplementary Figures

### a K562

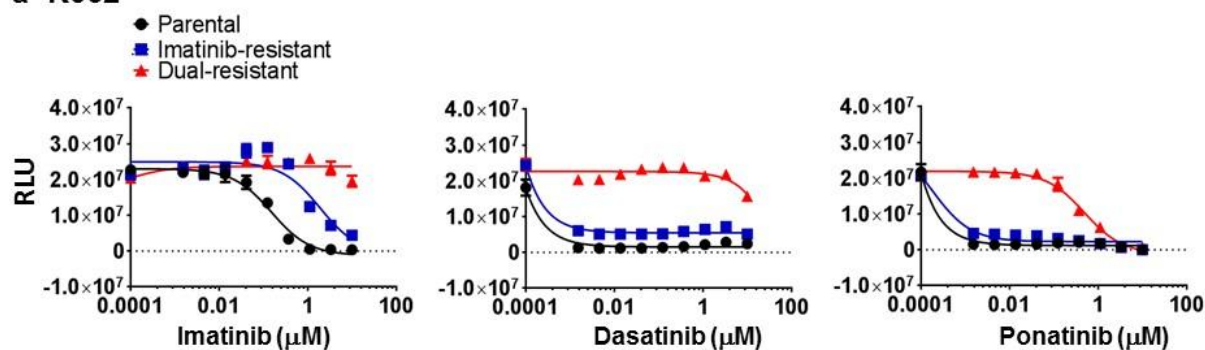

### b KCL-22

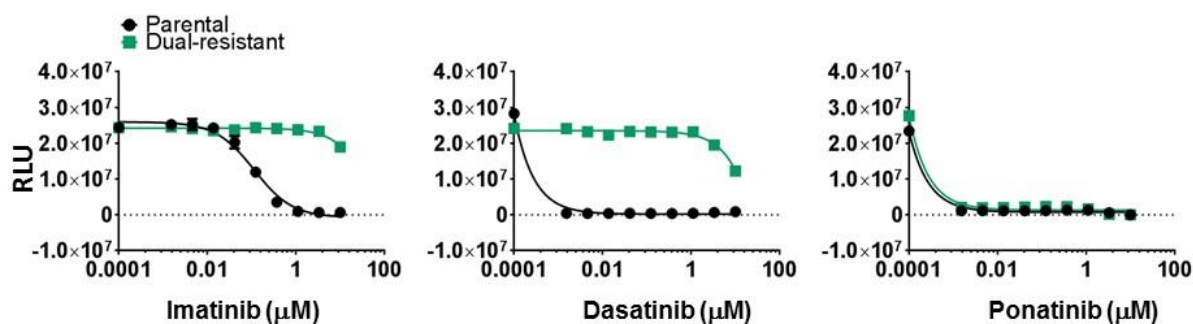

**Supplementary Figure S1. Imatinib and dual-resistant K562 cells are resistant to all three ABL-TKI therapies, whereas the KCL-22 cells are highly sensitive to ponatinib.** Graphs represent raw cell viability data corresponding to all K562 (a) and KCL-22 (b) cell line data prior to being normalized to d0 as shown in Figure 1. Data is shown as relative light units (RLU).

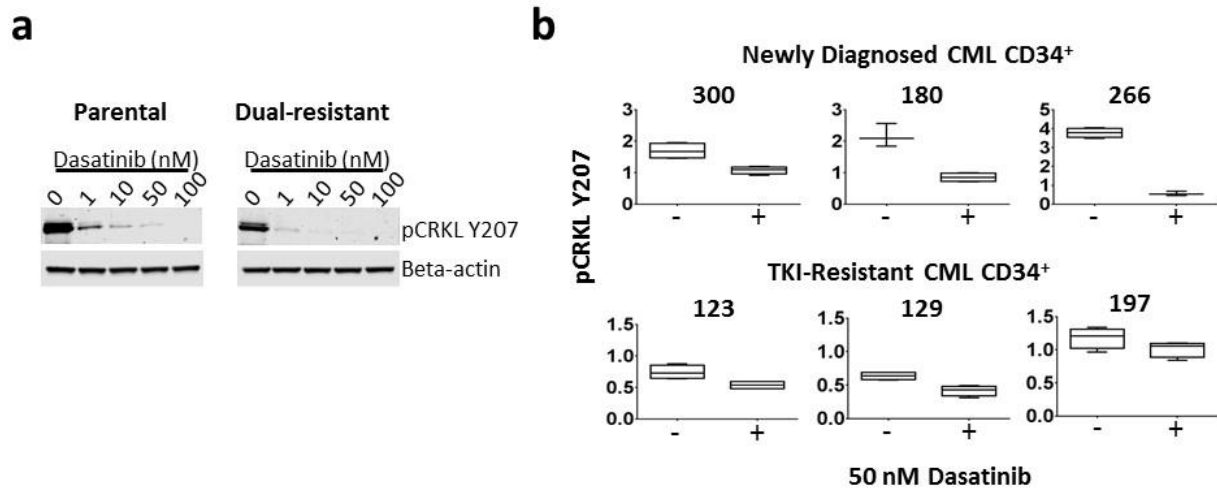

**Supplementary Figure S2. Effect of dasatinib on CRKL phosphorylation in parental and dual-resistant K562 cell lines and primary CML CD34<sup>+</sup> cells.** (a) Parental and dual-resistant cells were treated with 0-100 nM dasatinib for 4 h and analyzed for pCRKL Y207 levels by immunoblot analysis. (b) Primary CML CD34<sup>+</sup> cells were treated with 50 nM dasatinib for 4 h and assessed for pCRKL Y207 levels by reverse phase protein arrays. Data was normalized to total protein and log2 transformed.

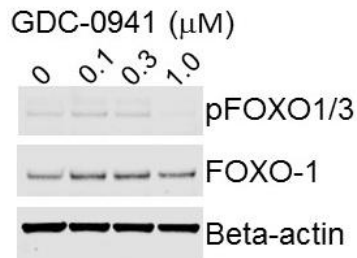

**Supplementary Figure S3. Effect of GDC-0941 on FOXO1 phosphorylation in the dual-resistant K562 cell line.** Dual-resistant K562 cells were treated with 0.1, 0.3 or 1  $\mu\text{M}$  GDC-0941 for 1 h and assessed for pFOXO1 by immunoblot analysis. Similar experiments were performed on the parental cell line, but expression of both FOXO1 and pFOXO1 were too low to detect (data not shown).

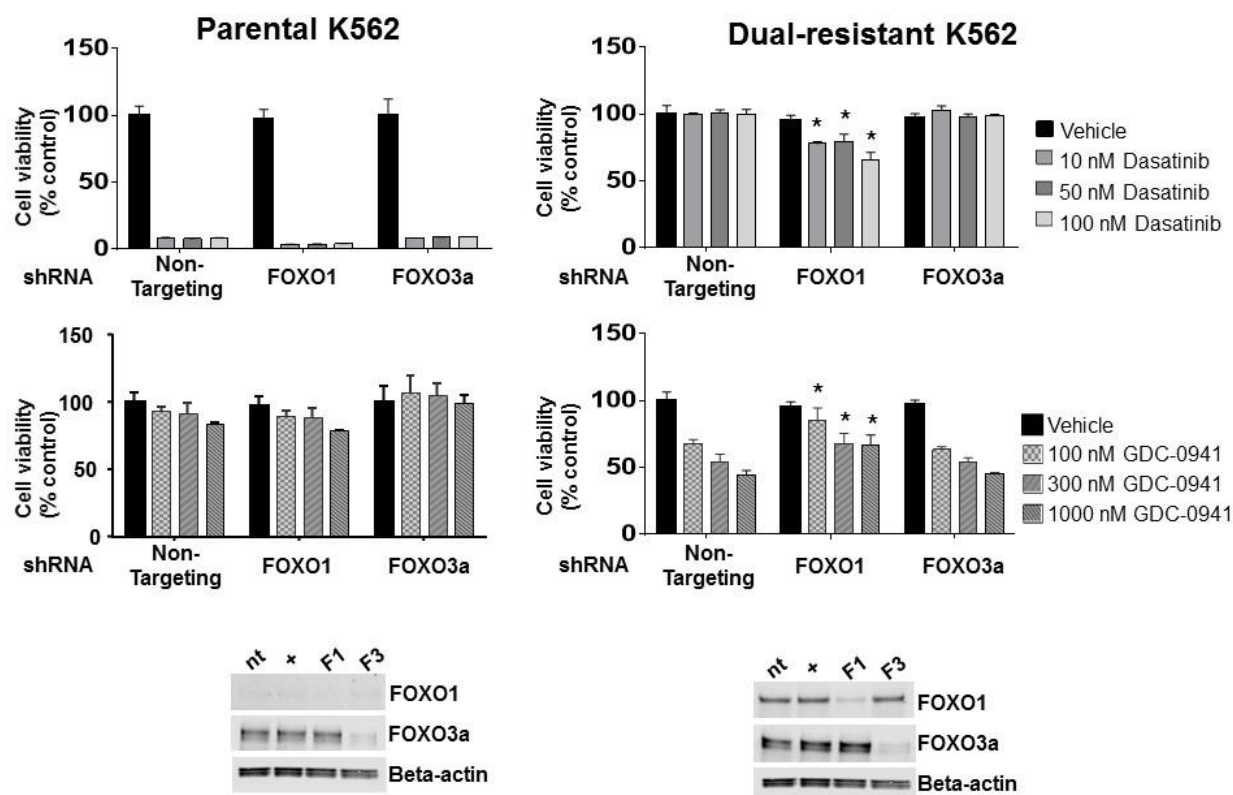

**Supplementary Figure S4. Knockdown of FOXO1 sensitizes dual-resistant K562 cells to dasatinib and attenuates sensitivity to GDC-0941.** Parental (*left*) and dual-resistant (*right*) K562 cells were lentivirally transduced with shRNA targeting either FOXO1 (F1) or FOXO3a (F3) or a non-targeting (nt) or GAPDH (+) control. Resulting cells were treated with dasatinib or GDC-0941 for 72 h at the indicated concentrations. Data represents the mean % of vehicle-treated, non-targeting control cells. Error bars represent standard deviation. \* $p < 0.05$ .

## Supplementary Tables

**Supplementary Table S1.** Primary samples used in this study

| Patient ID                                    | Diagnosis | Previous ABL-TKI Therapy               | BCR-ABL Mutation Status |
|-----------------------------------------------|-----------|----------------------------------------|-------------------------|
| <b>Newly Diagnosed patients</b>               |           |                                        |                         |
| 180                                           | CP-CML    | None                                   | None                    |
| 266                                           | CP-CML    | None                                   | None                    |
| 300                                           | CP-CML    | None                                   | None                    |
| <b>Relapsed with no BCR-ABL mutations</b>     |           |                                        |                         |
| 109                                           | AP-CML    | Nilotinib only                         | None                    |
| 113                                           | CP-CML    | Imatinib/Dasatinib/Nilotinib           | None                    |
| 123                                           | AP-CML    | Imatinib/Dasatinib/Nilotinib           | None                    |
| 124                                           | CP-CML    | Imatinib/Dasatinib/Nilotinib           | None                    |
| 128                                           | CP-CML    | Imatinib/Dasatinib/Nilotinib           | None                    |
| 129                                           | CP-CML    | Imatinib/Dasatinib                     | None                    |
| 131                                           | CP-CML    | Imatinib/Dasatinib/Nilotinib/Ponatinib | None                    |
| 137                                           | CP-CML    | Imatinib/Dasatinib/Nilotinib           | None                    |
| 142                                           | CP-CML    | Imatinib/Dasatinib/Nilotinib           | None                    |
| 151                                           | CP-CML    | Imatinib/Dasatinib                     | None                    |
| 159                                           | CP-CML    | Imatinib/Dasatinib/Nilotinib           | None                    |
| 185                                           | CP-CML    | Imatinib/Dasatinib/Nilotinib           | None                    |
| 186                                           | CP-CML    | Imatinib/Dasatinib/Nilotinib           | None                    |
| 197                                           | AP-CML    | Nilotinib only                         | None                    |
| <b>Relapsed with BCR-ABL kinase mutations</b> |           |                                        |                         |
| 77                                            | BP-CML    | Dasatinib/Nilotinib                    | T315I                   |
| 252                                           | CP-CML    | Imatinib/Nilotinib                     | E255K                   |

Abbreviations are as follows: AP-CML, accelerated phase CML; CP-CML, chronic phase CML; BP-CML, blastic phase CML.

**Supplementary Table S2.** Validated antibodies used in RPPA or immunoblot analyses

| Protein Name          | Antibody specificity       | modified residue           | Vendor         | Catalog number |
|-----------------------|----------------------------|----------------------------|----------------|----------------|
| 4EBP1                 | Phospho-serine             | S65                        | Cell Signaling | 9452           |
| Aceyl-coA carboxylase | Phospho-serine             | S79                        | Cell Signaling | 3661           |
| Akt                   | Phospho-threonine          | T308                       | Cell Signaling | 9275           |
| Arrestin 1 beta       | Phospho-serine             | S412                       | Cell Signaling | 2416           |
| ATP citrate Lyase     | Phospho-serine             | S455                       | Cell Signaling | 4331           |
| Bcl-2                 | Total                      |                            | Epitomics      | 1017-1         |
| Beta-catenin          | Phospho-serine             | S552                       | Cell Signaling | 9566           |
| b-Raf                 | Phospho-threonine          | T401                       | Epitomics      | 2298-1         |
| c-Abl                 | Phospho-tyrosine           | Y245                       | Cell Signaling | 2861           |
| Cofilin               | Phospho-serine             | S3                         | Cell Signaling | 3313           |
| CRKL                  | Phospho-tyrosine           | Y207                       | Cell Signaling | 3181           |
| cPLA2                 | Phospho-serine             | S505                       | Cell Signaling | 2831           |
| c-Raf                 | Phospho-serine             | S259                       | Cell Signaling | 9421           |
| eIF4G                 | Phospho-serine             | S1108                      | Cell Signaling | 2441           |
| ERK1/2                | Phospho-threonine/tyrosine | T202/Y204                  | Cell Signaling | 9101           |
| FAK                   | Phospho-tyrosine           | Y397                       | BD Biosciences | 611806         |
| FGFR3                 | Phospho-tyrosine           | Y724                       | Santa Cruz     | SC-33041       |
| FOXO-1                | Total                      |                            | Cell Signaling | 2880           |
| FOXO-1/3              | Phospho-threonine          | T24/32                     | Cell Signaling | 9464           |
| FOXO-3                | Total                      |                            | Cell Signaling | 12829          |
| FOXO-4                | Total                      |                            | Cell Signaling | 9472           |
| mTOR                  | Phospho-serine             | S2448                      | Cell Signaling | 2971           |
| p38 MAPK              | Phospho-threonine/tyrosine | T180/Y182                  | Cell Signaling | 4511           |
| p70S6 Kinase          | Phospho-threonine          | T389                       | Cell Signaling | 9205           |
| PKC pan beta II       | Phospho-serine             | S660                       | Cell Signaling | 9371           |
| PTEN                  | Total                      |                            | Cell Signaling | 9188           |
| S6 Riboprotein        | Phospho-serine             | S240/244                   | Cell Signaling | 5364           |
| Shc                   | Phospho-tyrosine           | Y317                       | Upstate        | 07-206         |
| Smad 1/5/8            | Phospho-serine             | S463/465;S463/465;S426/428 | Cell Signaling | 9511           |
| Src                   | Phospho-tyrosine           | Y416                       | Cell Signaling | 2101           |

**Supplementary Table S3.** shRNA sequences purchased from Dharmacon GE Lifesciences

| shRNA         | Vector               | Sequence            |
|---------------|----------------------|---------------------|
| Non-targeting | pSMART hCMV/TurboGFP | TGGTTTACATGTTGTGTGA |
| GAPDH         | pSMART hCMV/TurboGFP | GTGTGAACCATGAGAAGTA |
| FOXO1         | pSMART hCMV/TurboGFP | CGAGTTTAGTAACAGTGCA |
| FOXO3a        | pSMART hCMV/TurboGFP | CTATGTGTCTGGTCACTTA |

**Supplementary Table S4a.** Genotyping data of parental K562 and KCL-22 cell lines compared to their respective resistant cells and clones

| Identity of resistant cells and clones harboring mutation | Gene affected by mutation | Chromosome        | Position        | amino acid change type        | Variant Depth        | % Variant frequency        |
|-----------------------------------------------------------|---------------------------|-------------------|-----------------|-------------------------------|----------------------|----------------------------|
| None (including T315I)                                    | ABL1                      | chr9              | 133748283       | nonsynonymous SNV             | 0                    | 0                          |
| K562: clone 12                                            | APC                       | chr5              | 112163632       | nonsynonymous SNV             | 118                  | 16.21                      |
| K562: clone 13                                            | BAG2                      | chr6              | 57048734        | nonsynonymous SNV             | 26                   | 100                        |
| K562: dual-resistant cells                                | BCL2                      | chr18             | 60985559        | nonsynonymous SNV             | 39                   | 19.21                      |
| K562: clone 12                                            | BRCA2                     | chr13             | 32912090        | nonsynonymous SNV             | 260                  | 12.98                      |
| K562: dual-resistant cells                                | FGFR3                     | chr4              | 1803628         | nonsynonymous SNV             | 12                   | 14.29                      |
| K562: clone 4                                             | FURIN                     | chr15             | 91419743        | frameshift deletion           | 35                   | 97.22                      |
| K562:clone 12                                             | NF2                       | chr22             | 30051608        | nonsynonymous SNV             | 838                  | 16.05                      |
| K562:clone 12                                             | NOTCH3                    | chr19             | 15297997        | nonsynonymous SNV             | 45                   | 15.41                      |
| K562:clone 11                                             | PCBP2                     | chr12             | 53858617        | nonsynonymous SNV             | 26                   | 21.14                      |
| K562:clone 11                                             | PIK3R2                    | chr19             | 18273935        | nonsynonymous SNV             | 74                   | 23.87                      |
| K562:clone 12                                             | PTEN                      | chr10             | 89653819        | nonsynonymous SNV             | 634                  | 23.84                      |
| K562:clone 13                                             | SMARCA4                   | chr19             | 11129641        | nonsynonymous SNV             | 352                  | 12.1                       |
| K562:clone 17                                             | SMARCA4                   | chr19             | 11129641        | nonsynonymous SNV             | 386                  | 11.93                      |
| K562:clone 12                                             | SMARCA4                   | chr19             | 11129641        | nonsynonymous SNV             | 375                  | 13.35                      |
|                                                           | <b>Gene</b>               | <b>chromosome</b> | <b>position</b> | <b>amino acid change type</b> | <b>Variant Depth</b> | <b>% Variant frequency</b> |
| KCL-22 resistant pool                                     | ABL1 (T315I)              | chr9              | 133748283       | nonsynonymous SNV             | 487                  | 39.31                      |
| KCL-22 resistant pool                                     | BRCA2                     | chr13             | 32914046        | nonsynonymous SNV             | 1184                 | 52.23                      |
| KCL-22 resistant pool                                     | SMARCA4                   | chr19             | 11129641        | nonsynonymous SNV             | 388                  | 11.3                       |

**Supplementary Table S4b.** Common copy number changes found in all K562 resistant and dual-resistant clones

| Region                       | Cytoband Location | Event             | Region Length |
|------------------------------|-------------------|-------------------|---------------|
| chr1:156,033,119-156,121,675 | q22               | CN Gain           | 88556         |
| chr1:156,769,763-156,785,486 | q23.1             | CN Gain           | 15723         |
| chr1:156,855,043-156,874,778 | q23.1             | CN Gain           | 19735         |
| chr3:10,152,338-10,172,022   | p25.3             | LOH               | 19684         |
| chr6:43,376,408-43,731,249   | p21.1             | LOH               | 354841        |
| chr6:45,356,858-45,846,458   | p21.1             | LOH               | 489600        |
| chr6:135,915,090-136,239,693 | q23.3             | Allelic Imbalance | 324603        |
| chr6:137,305,405-137,865,120 | q23.3             | Allelic Imbalance | 559715        |
| chr6:138,102,669-141,710,518 | q23.3 - q24.1     | Allelic Imbalance | 3607849       |
| chr6:142,046,810-143,089,945 | q24.1 - q24.2     | Allelic Imbalance | 1043135       |
| chr6:143,840,188-145,626,680 | q24.2 - q24.3     | Allelic Imbalance | 1786492       |
| chr6:146,671,014-152,308,419 | q24.3 - q25.1     | Allelic Imbalance | 5637405       |
| chr6:152,488,203-154,335,788 | q25.1 - q25.2     | Allelic Imbalance | 1847585       |
| chr6:154,505,013-156,879,238 | q25.2 - q25.3     | Allelic Imbalance | 2374225       |
| chr6:157,661,869-159,994,563 | q25.3             | Allelic Imbalance | 2332694       |
| chr6:160,464,613-160,733,977 | q25.3             | Allelic Imbalance | 269364        |
| chr6:160,877,340-161,405,220 | q25.3 - q26       | Allelic Imbalance | 527880        |
| chr6:161,671,955-169,630,783 | q26 - q27         | Allelic Imbalance | 7958828       |
| chr6:170,313,770-171,115,067 | q27               | Allelic Imbalance | 801297        |
| chr8:488,787-1,241,469       | p23.3             | CN Gain           | 752682        |
| chr8:89,846,131-90,229,522   | q21.3             | LOH               | 383391        |
| chr17:27,580,998-28,883,543  | q11.2             | LOH               | 1302545       |
| chr17:37,172,086-37,717,570  | q12               | LOH               | 545484        |
| chr19:41,423,017-42,181,729  | q13.2             | LOH               | 758712        |
| chr19:42,882,567-42,912,442  | q13.2             | CN Gain           | 29875         |
| chr20:26,139,727-26,309,255  | p11.1             | LOH               | 169528        |
| chr20:30,028,437-30,151,385  | q11.21            | LOH               | 122948        |
| chr20:31,766,814-32,324,030  | q11.21 - q11.22   | LOH               | 557216        |
| chr20:34,962,918-35,996,604  | q11.23            | LOH               | 1033686       |



**Supplementary Table S4c.** Genes known to be present in the regions with copy number changes

| Gene Symbol  | Chromosome | Length | Name                                                                              | Aberration        |
|--------------|------------|--------|-----------------------------------------------------------------------------------|-------------------|
| RAB25        | chr1       | 9331   | RAB25, member RAS oncogene family                                                 | CN Gain           |
| MEX3A        | chr1       | 9987   | mex-3 homolog A                                                                   | CN Gain           |
| LMNA         | chr1       | 57513  | lamin A/C                                                                         | CN Gain           |
| SEMA4A       | chr1       | 27809  | semaphorin 4A                                                                     | CN Gain           |
| PRCC         | chr1       | 33337  | papillary renal cell carcinoma (translocation-associated)                         | CN Gain           |
| SH2D2A       | chr1       | 10607  | SH2 domain containing 2A                                                          | CN Gain           |
| PEAR1        | chr1       | 22705  | platelet endothelial aggregation receptor 1                                       | CN Gain           |
| BRK1         | chr3       | 11543  | BRICK1, SCAR/WAVE actin-nucleating complex subunit                                | LOH               |
| ABCC10       | chr6       | 22873  | ATP-binding cassette, sub-family C (CFTR/MRP), member 10                          | LOH               |
| DLK2         | chr6       | 5698   | delta-like 2 homolog (Drosophila)                                                 | LOH               |
| TJAP1        | chr6       | 29035  | tight junction associated protein 1 (peripheral)                                  | LOH               |
| LRRC73       | chr6       | 3380   | leucine rich repeat containing 73                                                 | LOH               |
| YIPF3        | chr6       | 5165   | Yip1 domain family, member 3                                                      | LOH               |
| POLR1C       | chr6       | 4471   | polymerase (RNA) I polypeptide C                                                  | LOH               |
| POLH         | chr6       | 44384  | polymerase (DNA directed), eta                                                    | LOH               |
| GTPBP2       | chr6       | 8720   | GTP binding protein 2                                                             | LOH               |
| MAD2L1BP     | chr6       | 11411  | MAD2L1 binding protein                                                            | LOH               |
| RSPH9        | chr6       | 25983  | radial spoke head 9 homolog                                                       | LOH               |
| MRPS18A      | chr6       | 16617  | mitochondrial ribosomal protein S18A                                              | LOH               |
| RUNX2        | chr6       | 222767 | runt-related transcription factor 2                                               | LOH               |
| LINC00271    | chr6       | 193039 | long intergenic non-protein coding RNA 271                                        | allelic imbalance |
| PDE7B        | chr6       | 343877 | phosphodiesterase 7B                                                              | allelic imbalance |
| NHEG1        | chr6       | 11074  | neuroblastoma highly expressed 1                                                  | allelic imbalance |
| IL20RA       | chr6       | 45192  | interleukin 20 receptor, alpha                                                    | allelic imbalance |
| IL22RA2      | chr6       | 29830  | interleukin 22 receptor, alpha 2                                                  | allelic imbalance |
| IFNGR1       | chr6       | 21948  | interferon gamma receptor 1                                                       | allelic imbalance |
| OLIG3        | chr6       | 2197   | oligodendrocyte transcription factor 3                                            | allelic imbalance |
| LOC100130476 | chr6       | 44565  | uncharacterized LOC100130476                                                      | allelic imbalance |
| TNFAIP3      | chr6       | 16128  | tumor necrosis factor, alpha-induced protein 3                                    | allelic imbalance |
| PERP         | chr6       | 19020  | PERP, TP53 apoptosis effector                                                     | allelic imbalance |
| PBOV1        | chr6       | 2502   | prostate and breast cancer overexpressed 1                                        | allelic imbalance |
| KIAA1244     | chr6       | 182749 | KIAA1244                                                                          | allelic imbalance |
| HEBP2        | chr6       | 9248   | heme binding protein 2                                                            | allelic imbalance |
| MIR3145      | chr6       | 83     | microRNA 3145                                                                     | allelic imbalance |
| NHSL1        | chr6       | 150489 | NHS-like 1                                                                        | allelic imbalance |
| FLJ46906     | chr6       | 5622   | uncharacterized LOC441172                                                         | allelic imbalance |
| LOC100507462 | chr6       | 48470  | uncharacterized LOC100507462                                                      | allelic imbalance |
| CCDC28A      | chr6       | 19801  | coiled-coil domain containing 28A                                                 | allelic imbalance |
| ECT2L        | chr6       | 107961 | epithelial cell transforming sequence 2 oncogene-like                             | allelic imbalance |
| REPS1        | chr6       | 83780  | RALBP1 associated Eps domain containing 1                                         | allelic imbalance |
| ABRACL       | chr6       | 14622  | ABRA C-terminal like                                                              | allelic imbalance |
| HECA         | chr6       | 45699  | headcase homolog (Drosophila)                                                     | allelic imbalance |
| TXLNB        | chr6       | 52011  | taxilin beta                                                                      | allelic imbalance |
| CITED2       | chr6       | 2397   | Cbp/p300-interacting transactivator, with Glu/Asp-rich carboxy-terminal domain, 2 | allelic imbalance |
| LOC645434    | chr6       | 5603   | uncharacterized LOC645434                                                         | allelic imbalance |
| LOC100132735 | chr6       | 89400  | uncharacterized LOC100132735                                                      | allelic imbalance |
| MIR3668      | chr6       | 76     | microRNA 3668                                                                     | allelic imbalance |
| MIR4465      | chr6       | 71     | microRNA 4465                                                                     | allelic imbalance |
| NMBR         | chr6       | 13193  | neuromedin B receptor                                                             | allelic imbalance |
| VTA1         | chr6       | 73677  | Vps20-associated 1 homolog (S. cerevisiae)                                        | allelic imbalance |
| GPR126       | chr6       | 144349 | G protein-coupled receptor 126                                                    | allelic imbalance |
| LOC153910    | chr6       | 111436 | uncharacterized LOC153910                                                         | allelic imbalance |
| HIVEP2       | chr6       | 193736 | human immunodeficiency virus type I enhancer binding protein 2                    | allelic imbalance |
| LOC285740    | chr6       | 15011  | uncharacterized LOC285740                                                         | allelic imbalance |
| PHACTR2      | chr6       | 223007 | phosphatase and actin regulator 2                                                 | allelic imbalance |
| LTV1         | chr6       | 20437  | LTV1 homolog (S. cerevisiae)                                                      | allelic imbalance |
| ZC2HC1B      | chr6       | 73912  | zinc finger, C2HC-type containing 1B                                              | allelic imbalance |
| PLAGL1       | chr6       | 124300 | pleiomorphic adenoma gene-like 1                                                  | allelic imbalance |
| HYMAI        | chr6       | 5835   | hydatidiform mole associated and imprinted (non-protein coding)                   | allelic imbalance |
| SF3B5        | chr6       | 738    | splicing factor 3b, subunit 5, 10kDa                                              | allelic imbalance |
| STX11        | chr6       | 41424  | syntaxin 11                                                                       | allelic imbalance |
| UTRN         | chr6       | 561299 | utrophin                                                                          | allelic imbalance |
| GRM1         | chr6       | 409951 | glutamate receptor, metabotropic 1                                                | allelic imbalance |
| RAB32        | chr6       | 11260  | RAB32, member RAS oncogene family                                                 | allelic imbalance |
| ADGB         | chr6       | 216463 | androglobin                                                                       | allelic imbalance |
| LOC729176    | chr6       | 2157   | katanin p80 subunit B-like 1 pseudogene                                           | allelic imbalance |
| STXBPS-AS1   | chr6       | 363227 | STXBPS antisense RNA 1                                                            | allelic imbalance |



| Gene Symbol  | Chromosome | Length | Name                                                                                           | Aberration        |
|--------------|------------|--------|------------------------------------------------------------------------------------------------|-------------------|
| TCP10        | chr6       | 11423  | t-complex 10                                                                                   | allelic imbalance |
| C6orf123     | chr6       | 12322  | chromosome 6 open reading frame 123                                                            | allelic imbalance |
| MLLT4-AS1    | chr6       | 2908   | MLLT4 antisense RNA 1 (head to head)                                                           | allelic imbalance |
| MLLT4        | chr6       | 145031 | myeloid/lymphoid or mixed-lineage leukemia (trithorax homolog, Drosophila); translocated to, 4 | allelic imbalance |
| HGC6.3       | chr6       | 1017   | uncharacterized LOC100128124                                                                   | allelic imbalance |
| KIF25        | chr6       | 27218  | kinesin family member 25                                                                       | allelic imbalance |
| FRMD1        | chr6       | 23377  | FERM domain containing 1                                                                       | allelic imbalance |
| DACT2        | chr6       | 12820  | dapper, antagonist of beta-catenin, homolog 2 (Xenopus laevis)                                 | allelic imbalance |
| SMOC2        | chr6       | 226845 | SPARC related modular calcium binding 2                                                        | allelic imbalance |
| THBS2        | chr6       | 38264  | thrombospondin 2                                                                               | allelic imbalance |
| LOC154449    | chr6       | 8237   | uncharacterized LOC154449                                                                      | allelic imbalance |
| DLL1         | chr6       | 8405   | delta-like 1 (Drosophila)                                                                      | allelic imbalance |
| MIR4644      | chr6       | 85     | microRNA 4644                                                                                  | allelic imbalance |
| FAM120B      | chr6       | 98395  | family with sequence similarity 120B                                                           | allelic imbalance |
| PSMB1        | chr6       | 18215  | proteasome (prosome, macropain) subunit, beta type, 1                                          | allelic imbalance |
| TBP          | chr6       | 18539  | TATA box binding protein                                                                       | allelic imbalance |
| PDCD2        | chr6       | 9122   | programmed cell death 2                                                                        | allelic imbalance |
| C8orf42      | chr8       | 55993  | chromosome 8 open reading frame 42                                                             | CN gain           |
| ERICH1       | chr8       | 67028  | glutamate-rich 1                                                                               | CN gain           |
| ERICH1-AS1   | chr8       | 400192 | ERICH1 antisense RNA 1                                                                         | CN gain           |
| CRYBA1       | chr17      | 7629   | crystallin, beta A1                                                                            | LOH               |
| NUFIP2       | chr17      | 38314  | nuclear fragile X mental retardation protein interacting protein 2                             | LOH               |
| MIR4523      | chr17      | 70     | microRNA 4523                                                                                  | LOH               |
| TAOK1        | chr17      | 160980 | TAO kinase 1                                                                                   | LOH               |
| ABHD15       | chr17      | 6355   | abhydrolase domain containing 15                                                               | LOH               |
| TP53I13      | chr17      | 4438   | tumor protein p53 inducible protein 13                                                         | LOH               |
| GIT1         | chr17      | 16125  | G protein-coupled receptor kinase interacting ArfGAP 1                                         | LOH               |
| ANKRD13B     | chr17      | 21254  | ankyrin repeat domain 13B                                                                      | LOH               |
| CORO6        | chr17      | 6669   | coronin 6                                                                                      | LOH               |
| SSH2         | chr17      | 304055 | slingshot protein phosphatase 2                                                                | LOH               |
| EFCAB5       | chr17      | 178598 | EF-hand calcium binding domain 5                                                               | LOH               |
| MIR3184      | chr17      | 76     | microRNA 3184                                                                                  | LOH               |
| MIR423       | chr17      | 95     | microRNA 423                                                                                   | LOH               |
| NSRP1        | chr17      | 69670  | nuclear speckle splicing regulatory protein 1                                                  | LOH               |
| SLC6A4       | chr17      | 41651  | solute carrier family 6 (neurotransmitter transporter, serotonin), member 4                    | LOH               |
| BLMH         | chr17      | 43973  | bleomycin hydrolase                                                                            | LOH               |
| TMIGD1       | chr17      | 17701  | transmembrane and immunoglobulin domain containing 1                                           | LOH               |
| CPD          | chr17      | 90735  | carboxypeptidase D                                                                             | LOH               |
| GOSR1        | chr17      | 49408  | golgi SNAP receptor complex member 1                                                           | LOH               |
| LRR37A11P    | chr17      | 23301  | leucine rich repeat containing 37, member A11, pseudogene                                      | LOH               |
| LOC100131347 | chr17      | 24434  | RAD52 motif 1 pseudogene                                                                       | LOH               |
| PLXDC1       | chr17      | 88348  | plexin domain containing 1                                                                     | LOH               |
| ARL5C        | chr17      | 9269   | ADP-ribosylation factor-like 5C                                                                | LOH               |
| CACNB1       | chr17      | 24249  | calcium channel, voltage-dependent, beta 1 subunit                                             | LOH               |
| RPL19        | chr17      | 4446   | ribosomal protein L19                                                                          | LOH               |
| STAC2        | chr17      | 15253  | SH3 and cysteine rich domain 2                                                                 | LOH               |
| FBXL20       | chr17      | 149014 | F-box and leucine-rich repeat protein 20                                                       | LOH               |
| MED1         | chr17      | 46991  | mediator complex subunit 1                                                                     | LOH               |
| CDK12        | chr17      | 73063  | cyclin-dependent kinase 12                                                                     | LOH               |
| CYP2B7P1     | chr19      | 26397  | cytochrome P450, family 2, subfamily B, polypeptide 7 pseudogene 1                             | LOH               |
| CYP2B6       | chr19      | 27099  | cytochrome P450, family 2, subfamily B, polypeptide 6                                          | LOH               |
| CYP2A13      | chr19      | 7746   | cytochrome P450, family 2, subfamily A, polypeptide 13                                         | LOH               |
| CYP2F1       | chr19      | 13930  | cytochrome P450, family 2, subfamily F, polypeptide 1                                          | LOH               |
| CYP2S1       | chr19      | 14331  | cytochrome P450, family 2, subfamily S, polypeptide 1                                          | LOH               |
| AXL          | chr19      | 42565  | AXL receptor tyrosine kinase                                                                   | LOH               |
| HNRNPUL1     | chr19      | 45422  | heterogeneous nuclear ribonucleoprotein U-like 1                                               | LOH               |
| CCDC97       | chr19      | 14696  | coiled-coil domain containing 97                                                               | LOH               |
| TGFB1        | chr19      | 23021  | transforming growth factor, beta 1                                                             | LOH               |
| B9D2         | chr19      | 9758   | B9 protein domain 2                                                                            | LOH               |
| TMEM91       | chr19      | 20118  | transmembrane protein 91                                                                       | LOH               |
| EXOSC5       | chr19      | 10982  | exosome component 5                                                                            | LOH               |
| BCKDHA       | chr19      | 27218  | branched chain keto acid dehydrogenase E1, alpha polypeptide                                   | LOH               |
| B3GNT8       | chr19      | 3373   | UDP-GlcNAc:betaGal beta-1,3-N-acetylglucosaminyltransferase 8                                  | LOH               |
| ATP5SL       | chr19      | 8622   | ATP5S-like                                                                                     | LOH               |
| C19orf69     | chr19      | 1609   | chromosome 19 open reading frame 69                                                            | LOH               |
| LOC100505495 | chr19      | 46482  | uncharacterized LOC100505495                                                                   | LOH               |
| CEACAM21     | chr19      | 10668  | carcinoembryonic antigen-related cell adhesion molecule 21                                     | CN gain           |
| CEACAM4      | chr19      | 8100   | carcinoembryonic antigen-related cell adhesion molecule 4                                      | CN gain           |
| CEACAM7      | chr19      | 14863  | carcinoembryonic antigen-related cell adhesion molecule 7                                      | CN gain           |
| MEGF8        | chr19      | 53162  | multiple EGF-like-domains 8                                                                    | CN gain           |
| CNFN         | chr19      | 3275   | cornifelin                                                                                     | CN gain           |
| LIPE         | chr19      | 25914  | lipase, hormone-sensitive                                                                      | CN gain           |
| LOC100996307 | chr19      | 255209 | uncharacterized LOC100996307                                                                   | CN gain           |

| Gene Symbol    | Chromosome | Length | Name                                                                     | Aberration |
|----------------|------------|--------|--------------------------------------------------------------------------|------------|
| LOC284801      | chr20      | 22216  | uncharacterized LOC284801                                                | LOH        |
| MIR663A        | chr20      | 94     | microRNA 663a                                                            | LOH        |
| DEFB123        | chr20      | 9651   | defensin, beta 123                                                       | LOH        |
| DEFB124        | chr20      | 7509   | defensin, beta 124                                                       | LOH        |
| REM1           | chr20      | 9605   | RAS (RAD and GEM)-like GTP-binding 1                                     | LOH        |
| LINC00028      | chr20      | 1798   | long intergenic non-protein coding RNA 28                                | LOH        |
| HM13           | chr20      | 55131  | histocompatibility (minor) 13                                            | LOH        |
| PSIMCT-1       | chr20      | 836    | malignant T cell amplified sequence 1 pseudogene                         | LOH        |
| BPIFA2         | chr20      | 13265  | BPI fold containing family A, member 2                                   | LOH        |
| BPIFA4P        | chr20      | 16859  | BPI fold containing family A, member 4, pseudogene                       | LOH        |
| BPIFA3         | chr20      | 10426  | BPI fold containing family A, member 3                                   | LOH        |
| BPIFA1         | chr20      | 7315   | BPI fold containing family A, member 1                                   | LOH        |
| BPIFB1         | chr20      | 26745  | BPI fold containing family B, member 1                                   | LOH        |
| CDK5RAP1       | chr20      | 42694  | CDK5 regulatory subunit associated protein 1                             | LOH        |
| SNTA1          | chr20      | 35937  | syntrophin, alpha 1                                                      | LOH        |
| CBFA2T2        | chr20      | 159911 | core-binding factor, runt domain, alpha subunit 2;<br>translocated to, 2 | LOH        |
| C20orf144      | chr20      | 1631   | chromosome 20 open reading frame 144                                     | LOH        |
| NECAB3         | chr20      | 17373  | N-terminal EF-hand calcium binding protein 3                             | LOH        |
| ACTL10         | chr20      | 2029   | actin-like 10                                                            | LOH        |
| E2F1           | chr20      | 10920  | E2F transcription factor 1                                               | LOH        |
| PXMP4          | chr20      | 17588  | peroxisomal membrane protein 4, 24kDa                                    | LOH        |
| ZNF341         | chr20      | 60269  | zinc finger protein 341                                                  | LOH        |
| DLGAP4         | chr20      | 161598 | discs, large (Drosophila) homolog-associated protein 4                   | LOH        |
| MYL9           | chr20      | 8341   | myosin, light chain 9, regulatory                                        | LOH        |
| TGIF2          | chr20      | 20481  | TGFB-induced factor homeobox 2                                           | LOH        |
| TGIF2-C20orf24 | chr20      | 38005  | TGIF2-C20orf24 readthrough                                               | LOH        |
| C20orf24       | chr20      | 6825   | chromosome 20 open reading frame 24                                      | LOH        |
| SLA2           | chr20      | 33697  | Src-like-adaptor 2                                                       | LOH        |
| NDRG3          | chr20      | 94374  | NDRG family member 3                                                     | LOH        |
| DSN1           | chr20      | 22038  | DSN1, MIND kinetochore complex component, homolog<br>(S. cerevisiae)     | LOH        |
| SOGA1          | chr20      | 86244  | suppressor of glucose, autophagy associated 1                            | LOH        |
| C20orf118      | chr20      | 18064  | chromosome 20 open reading frame 118                                     | LOH        |
| SAMHD1         | chr20      | 60021  | SAM domain and HD domain 1                                               | LOH        |
| RBL1           | chr20      | 98234  | retinoblastoma-like 1 (p107)                                             | LOH        |
| MROH8          | chr20      | 78347  | maestro heat-like repeat family member 8                                 | LOH        |
| RPN2           | chr20      | 62571  | ribophorin II                                                            | LOH        |
| GHRH           | chr20      | 5811   | growth hormone releasing hormone                                         | LOH        |
| MANBAL         | chr20      | 27614  | mannosidase, beta A, lysosomal-like                                      | LOH        |
| SRC            | chr20      | 60735  | v-src sarcoma (Schmidt-Ruppin A-2) viral oncogene homolog<br>(avian)     | LOH        |
